1 **Spatial heterogeneity and organization of tumor muta-**  
2 **tion burden and immune infiltrates within tumors based**  
3 **on whole slide images correlated with patient survival in**  
4 **bladder cancer**

5 Hongming Xu<sup>1</sup>, Sunho Park<sup>1</sup>, Jean René Clemenceau<sup>1</sup>, Jinhwan Choi<sup>1</sup>, Nathan Radakovich<sup>1</sup>, Sung  
6 Hak Lee<sup>2\*</sup> & Tae Hyun Hwang<sup>1\*</sup>

7 <sup>1</sup>*Department of Quantitative Health Sciences, Cleveland Clinic Lerner College of Medicine of*  
8 *Case Western Reserve University, Cleveland, OH 44195, USA.*

9 <sup>2</sup>*Department of Hospital Pathology, Seoul St.Mary's Hospital, College of Medicine, The Catholic*  
10 *University of Korea, Seoul, 06591 South Korea.*

11 \* *To whom correspondence should be addressed (emails): [hakjjang@catholic.ac.kr](mailto:hakjjang@catholic.ac.kr) or*  
12 *[hwangt@ccf.org](mailto:hwangt@ccf.org)*

13 **Abstract**

14

15 **High-TMB (TMB-H) could result in an increased number of neoepitopes from somatic mu-**  
16 **tations expressed by a patient's own tumor cell which can be recognized and targeted by**  
17 **neighboring tumor-infiltrating lymphocytes (TILs). Deeper understanding of spatial het-**  
18 **erogeneity and organization of tumor cells and their neighboring immune infiltrates within**  
19 **tumors could provide new insights into tumor progression and treatment response. Here we**  
20 **developed and applied computational approaches using digital whole slide images (WSIs) to**  
21 **investigate spatial heterogeneity and organization of regions harboring TMB-H tumor cells**

22 **and TILs within tumors, and its prognostic utility. In experiments using WSIs from The Can-**  
23 **cer Genome Atlas bladder cancer (BLCA), our findings show that WSI-based approaches**  
24 **can reliably predict patient-level TMB status and delineate spatial TMB heterogeneity and**  
25 **co-organization with TILs. TMB-H patients with low spatial heterogeneity enriched with**  
26 **high TILs show improved overall survival indicating a prognostic role of spatial TMB and**  
27 **TILs information in BLCA.**

## 28 **1 Introduction**

29 Tumor mutational burden (TMB) is a quantitative genomic biomarker that measures the number of  
30 mutations within a tumor. TMB level has been shown to be associated with better prognosis and  
31 clinical responses to immune-checkpoint inhibitors in various cancer types such as melanoma, lung  
32 cancer and bladder cancer [2, 18, 21, 22, 45]. Higher TMB levels are correlated with higher levels of  
33 neoantigens expressed by a cancer cell, which could help the neighboring tumor-infiltrating lym-  
34 phocytes (TILs) to recognize and kill them [1]. Various studies including clinical trials reported  
35 that patients with TMB high (TMB-H) and/or high density of TILs within tumors had favorable  
36 prognosis and response to immunotherapy in many cancer types [2, 16, 18, 21–26, 45]. Recent stud-  
37 ies showed that spatial heterogeneity and composition of immune cells in the tumor microenviron-  
38 ment could improve our understanding of how immune environment influences patients' prognosis  
39 and response to treatments, including immunotherapy [28, 30–33]. These findings might suggest  
40 that detecting regions harboring TMB-H tumor cells and TILs within the tumor microenvironment  
41 and analyzing their spatial architecture could provide new insights into the relationship between

42 spatial TMB and TIL co-arrangement and patient's outcome.

43 Tissue-based bulk DNA sequencing (e.g. whole exome sequencing (WES), targeted sequenc-  
44 ing, etc.) and mRNA sequencing are widely used to assess patient-level TMB status and quantify  
45 TILs in tumors, respectively. However, due to the limited tissue availability, high costs and time-  
46 consuming procedures, the clinical utility of tissue-based DNA and mRNA sequencing are limited.  
47 In addition, these bulk DNA and mRNA sequencing approaches were not designed to take into ac-  
48 count spatial intratumor TMB and immune heterogeneity, thus provide potentially biased samples  
49 leading to inconsistent testing results [43]. Although the blood-based TMB measurement (i.e. liq-  
50 uid biopsies) has recently become available, this approach poses similar challenges to tissue-based  
51 TMB measurements [3]. The development of single-cell DNA and mRNAseq has revealed a spec-  
52 trum of tumor cell and immune cell heterogeneity in the patient's tumor, but these approaches do  
53 not provide insight into the spatial organization of tumor and immune cell architecture [26,46–48].  
54 Most recently, spatial transcriptome technologies have enabled mapping of the spatial architecture,  
55 composition and interactions of various cell types within the tumor, but simultaneously elucidating  
56 both DNA (e.g., TMB status) and RNA-level characteristics of cells is still challenging [49–51].

57 The use of widely available histopathological images poses a promising alternative. Routine  
58 histopathological examination is the gold standard for diagnosis, grading, and quantification of  
59 TILs for various cancer types in a clinical setting. With the recent development in deep Learning,  
60 computational approaches based on whole slide images (WSIs) have been explored to predict ge-  
61 netic characteristics (e.g., mutation status, gene expression, etc.) present within tumor regions in

62 prostate [12], lung [14], colon, stomach [41], and pan-cancer [37,38].

63 WSI are also being widely used to detect tumor-infiltrating lymphocytes (TILs) and its  
64 quantification within the tumor by computational analysis. Recently, Saltz *et al.* (2018) proposed  
65 to use convolutional neural networks (CNN) to identify TIL in H&E stained WSIs and showed  
66 that spatial composition of TILs within tumors correlated with patient's prognosis across cancers.  
67 Corredor *et al.* [35] and Acs *et al.* (2019) [11] developed the algorithms to segment and detect  
68 TILs and used spatial composition and co-organization of TILs and cancer cell within tumors  
69 linked to cancer recurrence and prognosis in non-small cell lung cancer and melanoma, respec-  
70 tively. Most recently, Abduljabbar *et al.* (2020) performed a study integrating multiregion exome  
71 and RNA-sequencing (RNA-seq) data with spatial histology to investigate spatial tumor and im-  
72 mune microenvironment in LUAD and showed that lung adenocarcinoma (LUAD) subgroup with  
73 immune cold and low neoantigen burden (i.e., low TMB) was significantly correlated with poorer  
74 disease free survival [10]. This study demonstrated that the deep learning approach utilizing digital  
75 pathology images could provide a deeper understanding of how spatial composition of tumor and  
76 immune cells within tumor microenvironment impact tumor evolution and progression.

77 Given these studies showing that computational approaches and deep learning algorithms  
78 utilizing morphological features present in WSIs could reliably predict characteristics of tumor  
79 and immune cells and their spatial organization in tumors, we hypothesize that a carefully de-  
80 signed WSI-based computational method could accurately predict TMB status and TILs in given  
81 regions within tumors and be used to dissect spatial heterogeneity of TMB and its co-organization

82 with TILs across regions within tumors. Specifically, we hypothesize that the comprehensive un-  
83 derstanding of spatial co-occurrence of TILs with neighboring TMB-H or TMB-low (TMB-L)  
84 regions from pathology slides could provide a prognostic utility to identify patient subgroups with  
85 distinct survival outcome.

86 In this work, we first develop and evaluate deep-learning based computational pipelines to  
87 predict patient and tumor tile-level (i.e., dividing a WSI into small tiles for analysis) TMB status  
88 and TILs. We then use the tile-level TMB status to delineate spatial heterogeneity of TMB within  
89 WSIs. We perform a joint spatial analysis of regions harboring predicted TMB status and TILs  
90 within the tumor and use the spatial heterogeneity and arrangement information to identify patient  
91 subgroups (e.g., TMB-H tumor with low spatial TMB heterogeneity enriched with high density of  
92 TILs). To the best of our knowledge, this is the first work to interrogate spatial heterogeneity and  
93 organization of TMB with TILs within tumors to evaluate its prognostic utility to stratify patients  
94 using WSIs.

95 In experiments with TCGA Urothelial Bladder Carcinoma (BLCA) and Lung Adenocarci-  
96 noma (LUAD) cohorts, we first evaluated the performance of our proposed method using WSIs to  
97 predict patient-level TMB status against state-of-the-art methods, including deep learning and mul-  
98 tiple instance learning methods. The patient-level evaluation performed is mainly because ground  
99 truth TMB status is only assigned per patient. Then we applied our proposed model to predict TMB  
100 status at the tile level within WSIs for BLCA cohort and applied entropy measurement to evaluate  
101 spatial heterogeneity of TMB within WSIs. Finally, we performed a survival analysis of patient

102 subgroups based on spatial TMB and/or TILs information in BLCA cohort. Identification of pa-  
103 tient subgroups based on patient-level TMB status and TMB spatial heterogeneity status indicated  
104 that incorporating spatial heterogeneity of TMB could lead better patient stratification in BLCA  
105 cohort. We further investigated whether incorporating TILs status with spatial TMB status within  
106 the tumor could improve patient prognostication. We found that the integration of predicted TMB  
107 status and TIL densities within tumor regions could lead significant better patient risk stratification  
108 in BLCA.

## 109 **2 Results**

110 **Whole Slide Image Analysis Workflow.** We developed a computational pipeline using WSIs to  
111 predict patient-level TMB status and delineate spatial heterogeneity of TMB present in tumors. We  
112 also trained a deep learning model to detect TILs and quantify its densities within tumor regions.  
113 The aim of our approach is to incorporate spatial TMB heterogeneity with patient-level TMB  
114 status and TIL densities to identify patient subgroups that could lead to better patient stratification.  
115 The computational analysis workflow is shown in Fig. 1(a), which includes two main modules:  
116 automatic TMB prediction and TILs detection. In the automatic TMB prediction module, the  
117 trained convolutional neural network (CNN) based tumor detector is first applied to identify tumor  
118 regions in the WSI (see Fig. 1(b)). Affinity propagation (AP) clustering is then applied to select  
119 a subset of representative tumor regions (see Fig. 1(c)(d)). After that, transfer learning using  
120 Xception model is used to convert representative tumor patches into feature vectors. Finally, SVM  
121 with linear or RBF kernel is trained and tested on integrated patient-level feature vectors. In the

122 automatic TIL detection module, the trained tile-level Resnet18 deep learning model is utilized to  
123 identify TIL regions in the WSI. The ratio of identified TILs pixels over the total number of tumor  
124 pixels is quantified as a variable to characterize TIL density inside tumor regions. More technical  
125 details can be referred in the method section.

126 **Patient cohorts.** Two patient cohorts with digitally scanned WSIs were collected from the TCGA  
127 project through the Genomic Data Commons Portal ([https:// portal.gdc.cancer.gov/](https://portal.gdc.cancer.gov/)). The TCGA  
128 BLCA cohort consists of 386 patients (and corresponding clinical information) with 457 diagnostic  
129 H&E stained WSIs. The first diagnostic slide image (i.e., with DX1 suffix) was selected if there  
130 are multiple diagnostic slide images available for a patient. Based on the percentile of total number  
131 single nucleotide variants [2], 386 TCGA BLCA patients were categorized into 3 groups: 128 low,  
132 128 intermediate and 130 high TMB patients. One high and four low TMB patients were excluded  
133 due to severe pen marks on slides, thus 124 low and 129 high TMB patients were used to train and  
134 test a model to predict patient-level TMB-H and low status. Based on TMB prediction and TILs  
135 detection, the whole cohort of patients with survival information was used for prognosis analysis  
136 on patients' overall survivals. While we focused on BLCA cohort, we also collected TCGA LUAD  
137 cohort as an additional dataset to evaluate our proposed computational pipelines. In a similar way  
138 with TCGA BLCA cohort, 478 TCGA LUAD patients with 541 diagnostic H&E stained WSIs  
139 were collected and divided into TMB high, intermediate and low based on the number of somatic  
140 mutations. Due to severe pen marks on slides, 18 low and 4 high TMB LUAD patients were  
141 excluded from the image analysis. Finally, 140 low and 157 high TMB patients were used to train  
142 and test a model to predict patient-level TMB-H and low status in the LUAD cohort.

143 **Evaluation on patient-level TMB Prediction.** We first investigated whether the use of either  
144 tumor detection, representative tile selection, or color normalization as well as different transfer  
145 learning models could impact the performance of patient-level TMB prediction. Using TCGA  
146 BLCA dataset, we ran patient-level TMB prediction experiments by excluding tumor detection  
147 (abbreviated as P-E-TD), no representative tile selection (abbreviated as P-E-RTS), or no color nor-  
148 malization (abbreviated as P-E-CN). We also tested transfer learning on two well-known models,  
149 Inception-v3 (abbreviated as P-InceptionV3) [15] and Resnet50 (abbreviated as P-Resnet50) [13],  
150 in addition to Xception model (abbreviated as P-Xception), to evaluate whether different trans-  
151 fer learning models could impact patient-level TMB prediction performance. We trained SVM  
152 classifiers with linear or RBF kernels to predict patient-level TMB status. The leave-one-out cross  
153 validation was employed during testing different configurations. ROC curves of patient-level TMB  
154 prediction using different settings in our pipeline are shown in Figs. 2(a) and (b) using SVM with  
155 linear kernel (Linear SVM) and SVM with RBF kernel (RBF SVM), respectively (see more details  
156 in Table s3). The linear and RBF SVMs with P-Xception and P-E-RTS models achieved overall  
157 best AUROC values compared to other methods. While both approaches showed good prediction  
158 performance, the P-Xception model used the 11,164 selected representative tiles out of 125,358  
159 tiles, which required significantly less computational time (see computational comparison exam-  
160 ple in Table s4) compared to the P-E-RTS model. This indicates that the use of AP clustering to  
161 select a set of representative tiles from a WSI increases computational efficiency without a signifi-  
162 cant loss of prediction performance. Therefore we used the AP clustering module in our proposed  
163 pipeline for further experiments. The patient-level TMB prediction performance using Xception



164 model (P-Xception) is more accurate than those of Inception-v3 (P-InceptionV3) and Resnet50  
165 (P-Resnet50), thus we used Xception model as the transfer learning algorithm in our pipeline for  
166 the rest of experiments.

167 To compare the performance of patient-level TMB prediction with other state-of-the-art  
168 methods, we trained our designed CNN model (see Fig.s1 in supplementary methods), VGG16-  
169 TL2 [39] and Resnet18 [41], and Multiple Instance Learning based deep learning algorithm [42]  
170 as baseline models. To train these deep learning models, tumor tiles of each WSI were assigned  
171 the same label (e.g., TMB-H or low status) as the corresponding patient-level TMB status. The  
172 final patient-level TMB prediction was obtained by averaging prediction probabilities of all tumor  
173 tiles. In addition, we also extracted local binary pattern (LBP) texture features from representative  
174 tumor tiles and made predictions using an SVM classifier with RBF kernel as the baseline. Three-  
175 fold cross validation was applied to evaluate baseline deep learning models, due to computational  
176 complexity, and the leave-one-out cross validation was used to evaluate the rest methods. Table 1  
177 shows patient-level TMB prediction results in terms of accuracy ( $ACC$ ), specificity ( $SPE$ ), sensi-  
178 tivity ( $SEN$ ) and AUROC values for our proposed method and baseline models. Fig. 2(c) and (d)  
179 shows patient-level TMB prediction performance in TCGA BLCA and LUAD, respectively. Over-  
180 all, the proposed pipeline provides better performance over baseline methods, which achieves from  
181 2% to 5% improvements with respect to AUROC values. Taken together, these results indicate the  
182 efficacy of the proposed method to predict patient-level TMB status using WSIs.

183 **Spatial heterogeneity of TMB status correlated with overall survival outcome in BLCA.** We  
184 investigated whether patient-level TMB status predicted based on WSIs could be useful to identify  
185 patient subgroups with distinct clinical outcome on the whole TCGA BLCA cohort. The patient-  
186 level TMB status for WES-based TMB high or low group was predicted from our trained SVM  
187 with RBF kernel during the leave-one-out cross validation as described in above section. The  
188 patient-level TMB status for WES-based TMB intermediate group was independently predicted as  
189 TMB high or low by our trained SVM with RBF kernel on WES-based TMB high and low groups.  
190 We grouped the whole TCGA BLCA cohort into two subgroups: predicted TMB-High vs TMB-  
191 Low, and then generated a Kaplan Meier (KM) plot of the two subgroups using overall survival  
192 (OS) (see Fig.s8(a)). While the predicted patient-level TMB-High subgroup shows a trend towards  
193 better overall survival (OS), OS difference was not significant between two subgroups using log-  
194 rank test (P=0.072). We then evaluated if the the spatial heterogeneity of TMB (SH-TMB) within  
195 the patient's tumor could be used to stratify patient subgroups with distinct clinical outcome. We  
196 applied the proposed TMB prediction approach on the APC-selected representative tumor tiles.  
197 Then, the corresponding tumor regions were assigned the same TMB status of their respective  
198 representative tile. To determine the SH-TMB status, we calculated the Shannon entropy [36] of  
199 predicted TMB levels of tumor regions within the WSI, i.e.,  $S = -\sum_k P_k \log_2(P_k)$ , where  $P_k$  is  
200 the ratio between the number of the  $k$ th unique TMB prediction probability and the total number  
201 of tumor tiles within the WSI. A high entropy value indicates high SH-TMB (e.g., mixture of  
202 predicted TMB-H and low regions), while low entropy value indicates low SH-TMB within a  
203 tumor (e.g., either TMB-H or low status across most of tumor regions within WSIs). High or

204 low entropy status was determined by using the median entropy value from all patients of TCGA  
205 BLCA cohort as the threshold (see Fig.s10(a), Table s10). Fig. 3 shows a visualization of SH-TMB  
206 heatmaps based on tile-level TMB prediction, where red and blue colors indicate predicted TMB-  
207 H and low status probability, respectively. Fig. 3(a) shows a SH-TMB heatmap of TMB-H patient  
208 based on Whole Exome Sequencing (WES) data. Our WSI-based method correctly predicted the  
209 patient-level TMB status. The entropy value based on tile-level TMB prediction indicated low  
210 SH-TMB. Specifically, the heatmap showed that most tumor regions within the WSI presented  
211 TMB-H status, while few tumor regions presented TMB low status. Similarly, Fig. 3(b) showed  
212 that our WSI-based method correctly predicted the patient level TMB status as TMB low and low  
213 SH-TMB for the WSI-based TMB low patient. Fig. 3(c) and (d) showed that while WSI-based  
214 patient level TMB status of these two patients agreed with WES-based patient level TMB status,  
215 there are different mixtures of TMB-H and low status within tumor regions. Higher entropy values  
216 based on tile-level TMB status indicate higher degree of SH-TMB within WSIs.

217 To investigate the prognostic utility of SH-TMB status, we selected patient subgroups by uti-  
218 lizing both patient-level TMB prediction and SH-TMB status. In experiments using TCGA BLCA  
219 cohort, we predicted patient-level TMB status for 368 patients using our proposed WSI-based  
220 method. For each patient, we assigned low or high SH-TMB status based on entropy values de-  
221 rived from tile-level TMB prediction. We assigned patients with predicted patient-level TMB-high  
222 and low SH-TMB into one subgroup and the rest of patients to the "Others" subgroup. Then, we  
223 generated an OS KM plot segregating by these subgroups (Fig. 4(a)), which indicates that the two  
224 subgroups have statistically significantly different OS by using log-rank test ( $P = 0.016$ ). By uni-

225 variate analysis using Chi-square test, the TMB subtypes correlated significantly with differences  
226 in tumor stage ( $P = 0.024$ ), but not age (Age>60 vs others,  $P = 0.872$ ), sex ( $P = 0.086$ ), lym-  
227 phovascular invasion ( $P = 0.064$ ) and inflammatory infiltrate response ( $P = 0.428$ ) (see Table s5).  
228 The patients in patient-level TMB-H with low spatial heterogeneity subgroup had more advanced  
229 tumor stage. The TMB subtypes did not significantly correlate with known molecular subtypes  
230 determined by Reverse Phase Protein Array (RPPA) ( $P = 0.761$ ) and mRNA subtypes ( $P = 0.942$ )  
231 from TCGA BLCA study. Multivariable Cox proportional-hazard analyses of cancer stage and  
232 TMB subtypes in relation to the risk of death showed that TMB subtypes remained statistically  
233 significantly correlated with survival (see Table s6). A KM analysis of TMB subtypes based on  
234 both patient-level TMB and SH-TMB status showed that TMB subtypes with high SH-TMB status  
235 have worse OS, regardless of patient-level TMB status (see Fig.s8(b)). We further investigated  
236 whether incorporating WSI-based patient-level TMB and spatial heterogeneity with tissue-based  
237 TMB testing could improve patient stratification. While WES-based TMB-H patients tend to have  
238 better prognosis, we hypothesize that integrating WSI-based patient-level TMB status as well as  
239 spatial heterogeneity with WES-based TMB status could further improve patient stratification. To  
240 test our hypothesis, we selected 126 WES-based TMB-high patients and divided them into two  
241 subgroups: 1) WSI-based patient-level TMB-high and low SH-TMB patient subgroup (HHL) and  
242 2) the rest of WES-based TMB-high patient subgroup (w/o HHL), respectively. Fig. 4(b) showed  
243 that WES-based TMB-H & WSI-based patient-level TMB-H and low SH-TMB patient subgroup  
244 has better OS compared to the other subgroup (log rank test  $P = 0.018$ ). Taken together, these  
245 results indicate that incorporating WSI-based patient-level TMB status with SH-TMB information

246 could lead to better patient subgroup identification with distinct OS outcome.

247 **Spatial analysis of TMB heterogeneity and TILs within tumors further improved patient risk**

248 **stratification in BLCA.** Finally, we investigated that whether the use of spatial co-organization of

249 predicted TMB-H and TILs within the tumor could improve prognostication. We hypothesize that

250 a patient whose majority tumor regions are enriched with TMB-H status (e.g., patient-level TMB-

251 H with low spatial TMB-H heterogeneity) and co-localized with high densities of TILs might have

252 better prognosis. For instance, tumors with patient-level TMB-H and low spatial TMB-H hetero-

253 geneity status enriched with high density of TILs (i.e., high number of both TMB-H and TILs

254 regions within the tumor) could show better prognosis compared to patients either having low

255 number of TILs with TMB-H tumors or TMB-L tumors regardless of TILs status. We measured

256 TIL densities within tumor regions for all patients of TCGA BLCA cohort and used the median

257 TIL density score to divide patients into TIL high or low patient subgroups (e.g., >8.12% as TIL

258 high patient subgroup) (see Fig.s10(b)). Then we selected a subset of patients from a TIL high sub-

259 group with the following criteria: predicted TIL **High** & predicted TMB **High** & predicted **Low**

260 SH-TMB (HHL). Similarly, to investigate whether high or low level of TILs densities could be

261 linked to patients' prognosis, we also selected patients from a TIL low subgroup with the following

262 criteria: predicted TIL **Low** & predicted TMB **High** & predicted **Low** SH-TMB (LHL). Patients

263 belonging to the HHL subgroup tend to have most tumor regions carrying TMB-H status (i.e., a

264 patient-level TMB-H with low SH-TMB) and higher level of TILs co-present within the patient's

265 tumor (ANOVA testing  $p < 0.001$ ) (see Fig.s11(a)). Fig. 5 shows visualization of TMB-H and TILs

266 carrying regions within the tumors in the HHL, LHL and other subgroups. Fig. 4(c) shows a KM

267 plot of three subgroups (e.g., the HHL subgroup vs the LHL subgroup vs other patients) and a  
268 log rank test indicates that three subgroups have statistically significant different OS ( $P=0.0027$ ).  
269 The HHL subgroup showed overall best OS compared to two other subgroups. Multivariable Cox  
270 proportional-hazard analyses of cancer stage, lymphovascular invasion, mRNA-based molecular  
271 subtype, and joint TIL-TMB based patient subgroups in relation to the risk of death showed that  
272 joint TIL-TMB based patient subgroups remained statistically significantly correlated with OS (see  
273 Table s7). Interestingly, although patients in the LHL subgroup carry patient-level TMB-H with  
274 low spatial TMB-H heterogeneity, the LHL subgroup showed poorer OS compared to the HHL sub-  
275 group (HR: 3.30, 95% CI: 1.34-8.12,  $P<0.01$ ). Lastly, we selected WES-based TMB-H patients  
276 and divided into three subgroups: predicted TIL **High** & WES-based TMB **High** & WSI-based pre-  
277 dicted TMB **High** & predicted **Low** SH-TMB (HHHL) vs predicted TIL **Low** & WES-based TMB  
278 **High** & WSI-based predicted TMB **High** & predicted **Low** SH-TMB (LHHL) vs other WES-based  
279 TMB-H patients. Three subgroups from WES-based TMB-H patients have statistically different  
280 TMB-H and TILs overlapped ratio while the HHHL subgroup carrying the highest TMB-H and  
281 TILs overlapped ratio among the subgroups (ANOVA testing  $p=0.005$ ) (see Fig.s11(b)). Fig. 4(d)  
282 shows a KM plot of three subgroups and indicates that patients in the HHHL subgroup present  
283 better OS than other WES-based TMB-H patient subgroups (log rank test  $p=0.034$ ). These results  
284 show that incorporating TILs density with patient-level and SH-TMB within the tumor based on  
285 WSIs and could provide a novel prognostic biomarker to identify high or low risk patient sub-  
286 groups.

### 287 **3 Discussion**

288 Intratumor heterogeneity is one of key mechanisms driving disease progression, response and resis-  
289 tance to therapies [29, 31]. Multi-regional tissue-based sequencing from a tumor has shown spatial  
290 heterogeneity of mutational signature, mutational burden, T-cell receptor repertoire, etc. [3, 4, 6, 7]  
291 and its implication for treatment strategy [8]. While the multi-regional tissue-based sequencing  
292 approach could provide landscape of spatial heterogeneity, it is practically challenging to gener-  
293 ate such data, due to high costs, limited tissue availability, etc.. In this study, we present 1) the  
294 transfer learning based computational pipeline utilizing WSIs to predict patient-level TMB sta-  
295 tus and investigate spatial heterogeneity of TMB within tumors. We showed that our proposed  
296 computational pipeline could achieve overall best performance to predict patient-level TMB status  
297 compared to other state of the art methods. We also showed that measuring and incorporating  
298 spatial heterogeneity of TMB status with patient-level TMB status based on WSIs or combined  
299 with WES-based TMB status could lead to identify patient subgroups with distinct OS outcomes.  
300 Specifically, we found that incorporating SH-TMB information with predicted patient-level TMB  
301 status could improve patient risk stratification compared to the use of predicted patient-level TMB  
302 status alone (See Fig.s8(a) and (b)) in TCGA BLAC cohort. More specifically, patient-level TMB-  
303 H with low SH-TMB status was correlated with better OS. Visual inspection of selected tumor  
304 tiles from WSIs by our pathologist indicates that predicted TMB-H representative tumor tiles from  
305 patient-level TMB-H WSIs are present with higher densities of TILs, while showing more high  
306 grade tumors (see Table s9). This is consistent with the univariate analysis of TMB subtypes  
307 showing a higher portion of high grade tumors in patient-level TMB-H and low SH-TMB tumors.

308 Although we observe an enrichment of high graded tumors in this TMB-H subgroup, we reasoned  
309 that the higher presence of TILs within the tumors from this subgroup might lead better prognosis.  
310 To further investigate whether higher level of TILs with SH-TMB within tumors correlates with  
311 patients' OS, we trained end-to-end deep learning models to detect TILs and quantify TILs density  
312 within tumor regions. The predicted TILs density scores were incorporated with SH-TMB infor-  
313 mation within tumors to identify patient subgroups. The survival analysis of patient subgroups  
314 with and without high TILs presence within TMB-H tumors showed that patients carrying TMB-H  
315 status within most of tumor regions enriched with high number of TILs have statistically signifi-  
316 cant better OS. It is worth to note that patient subgroup identification and survival analysis using  
317 solely TILs high and low densities information (e.g., TILs high vs low ) did not show statistically  
318 significant OS difference using log rank test in TCGA BLAD and LUAD cohorts (P=0.32 and  
319 P=0.35 in Fig.s8(c) and s9(d), respectively), which indicates the importance of joint spatial TILs  
320 and TMB analysis as a prognostic biomarker. It is also worth to note that in TCGA LUAD co-  
321 hort a patient subgroup carrying patient-level TMB-H and low SH-TMB status with high TILs has  
322 statistically significant better overall survival compared to another patient subgroup (log rank test  
323 P=0.04 in Fig.s9(e)). However, we did not find meaningful correlation among patient subgroups  
324 based on other criteria (e.g., patient-level TMB-H and spatial low heterogeneity of TMB-H status  
325 vs others in Fig.s9(a)(b)(c)(d)(f)). This may indicate that the correlation between spatial TMB and  
326 TILs patterns linked with OS would be present in a specific type of cancers rather than pan-cancer  
327 types, and would need for further investigation across cancer types. Nonetheless, our analysis  
328 demonstrated the prognostic utility of spatial TMB and TILs information based on WSIs in BLCA



329 cohort. To the best of our knowledge, this is the first study to predict SH-TMB and investigate  
330 prognostic utility of spatial organization of TMB and TILs information for patient stratification in  
331 bladder cancer.

332       There are several limitations and challenges in our study. While we showed overall better  
333 performance to predict patient-level TMB status compared with baseline methods, a larger inde-  
334 pendent cohorts from multiple institutes are needed to validate the performance of the proposed  
335 pipeline and its generalizability. Our evaluations indicated that various deep learning-based pre-  
336 diction models, including end-to-end deep learning models, to predict patient-level TMB status did  
337 not show superior performance. Larger and more well-annotated WSI datasets would be needed  
338 to better train and improve the performance of deep learning-based prediction models (and thus  
339 our computational pipeline too, since we employ deep learning-based transfer learning models).  
340 Our WSI-based image analysis is performed based on a tile-level not a single cell level without  
341 distinguishing certain types of immune cells, and did not take into account specific types of spa-  
342 tial arrangement patterns between regions harboring TMB-H and TILs (e.g., TILs densities within  
343 local TMB-H clustered regions). For instance, the single cell level lymphocyte/immune cell detec-  
344 tion (e.g., CD4+/CD8+/FOXP3+) and joint spatial analysis of TMB-H tumor cell and/or region and  
345 TILs and/or more advanced statistical TMB and TILs spatial modeling [10] could provide higher  
346 resolution of TMB-H tumor and immune co-localization within tumor and immune microenviron-  
347 ment (TIME).

348       In summary, this study demonstrates the feasibility of predicting patient-level TMB status

349 and delineating spatial heterogeneity and organization of TMB and TILs by using computational  
350 models based on histological WSIs. Our spatial TMB and TILs analysis shows that patients with  
351 more homogeneous TMB-H status across regions within the tumor carrying high density of TILs  
352 present better prognosis in bladder cancer. Joint spatial analysis of TILs and TMB within TIME  
353 for patients' tumor provides an unique insight into how immune environment might have an in-  
354 fluence on prognosis of patients with TMB-H status. By combining tissue-based TMB-H status  
355 with image-based TMB-H/L SH-TMB status could further improve patient stratification in bladder  
356 cancer. Taken together, our work provides new foundation of how spatial characterization of tumor  
357 (e.g., TMB-H status) and immune environment within the tumor based on WSIs could be used to  
358 improve risk stratification in bladder cancer.

#### 359 **4 Materials and Methods**

360 **Automatic TMB Prediction.** Our designed patient-level TMB prediction includes the following  
361 four steps. More implementation details and parameter settings could be referred in the supple-  
362 mentary methods.

363 (1) Tumor Detection: We trained a light-weight convolutional neural network (see the archi-  
364 tecture in Fig.s1) model with only about 0.28M trainable parameters to detect tumor regions in the  
365 WSI. Given the WSI, it is first divided into non-overlapping tiles ( $512 \times 512$  pixels at  $20 \times$  magni-  
366 fication). The CNN-based tumor detector then predicts each tile as the probability of belonging to  
367 cancer regions. The prediction map corresponding to the WSI is generated by stitching predicted

368 probabilities for all image tiles. An empirical threshold (e.g., 0.5) is applied on the prediction  
369 map to obtain tumor regions. Our quantitative evaluations showed that the designed CNN-based  
370 tumor detector could provide over 90% dice coefficient in bladder cancer detection and a superior  
371 performance than several comparative models (see Fig.s6, s7 and Table s1). Fig. 1(b) illustrates an  
372 example of cancer detection on a WSI.

373 (2) Representative Tile Selection. To improve computational efficiency in analyzing large  
374 predicted tumor regions, we selected a subset of representative tumor regions for analysis. We  
375 first divided predicted tumor regions into a set of non-overlapping tiles ( $128 \times 128$  pixels) at  $2.5 \times$   
376 magnification. We then characterized each tumor tile by a 42 dimensional feature vector (i.e.,  
377 40 multi-scale local binary pattern features [17] and 2D location of the tumor tile). After that,  
378 affinity Propagation (AP) clustering [19] was applied to identify tumor regions containing tiles  
379 with similar morphological patterns [44]. The AP clustering simultaneously identified a number of  
380  $r$  local tumor regions and their representative tiles  $R_j$ , where  $1 \leq j \leq r$ . Fig. 1(c)(d) illustrates AP  
381 clustering of tumor tiles on a WSI, where tumor tiles belonging to different clusters are indicated by  
382 different color of blocks in the image. Note that there are 56 ( $r = 56$  for this example) representative  
383 tiles selected among 490 tumor tiles for the patient slide shown in Fig. 1(c).

384 (3) Feature Extraction. We used transfer learning on pre-trained deep learning models to  
385 generate features for selected representative tumor tiles. First, to suppress the influence of color  
386 variations, a color deconvolution based method [20] is utilized to normalize tumor tiles into a  
387 standard color appearance. Second, transfer learning on pre-trained Xception [27] model was used

388 to extract features from selected tumor tiles. Given an input tumor tile  $R_j$  at  $20\times$  magnification  
389 ( $1024\times 1024$  pixels), the transfer learning model outputs a high-level feature representation  $V_j$   
390 which is a 2048 dimensional vector (see Fig.s4). Finally, the feature vector  $\bar{V}$  representing the  
391 WSI was obtained by integrating features of representative tumor tiles together, i.e.,  $\bar{V} = \sum_{j=1}^r \rho_j V_j$ ,  
392 where  $\rho_j = \lambda_j / \sum_{j=1}^r \lambda_j$  and  $\lambda_j$  represents the number of tumor tiles belonging to the  $j$ th cluster.  
393 The feature vector  $\bar{V}$  is the weighted mean of features extracted from representative tiles, where  
394 each representative tile stands for the major characteristics of tumor tiles within the cluster.

395 (4) TMB classification. We trained the Support Vector Machine (SVM) classifier based on  
396 features generated from the transfer learning model to predict patient-level TMB status. First, prin-  
397 cipal component analysis (PCA) was used to reduce the feature dimension to prevent over-fitting.  
398 In this study, we selected the top 100 principal components which provided a superior performance  
399 in our testing. Second, feature standardization was performed on each feature component, which  
400 ensured its values have zero mean and unit variance. Finally, SVM with radial basis function  
401 (RBF) and linear kernels were trained to predict patient-level TMB status.

402 **TILs Detection.** We trained and tested 144 different deep learning models to detect TILs by mak-  
403 ing use of a public dataset [44], which included 43,440 annotated image tiles. Among 144 trained  
404 TIL detectors, the best Resnet18 model provided over the 80% accuracy in distinguishing TIL and  
405 Non-TIL tiles during independent testing (see Fig.s5(a) and Table s2), which was selected to per-  
406 form TIL detection. To identify TIL regions in pathology slides, the WSI was first divided into  
407 a set of non-overlapping image tiles (i.e.,  $112\mu\text{m}\times 112\mu\text{m}$  per image tile). The image tiles were

408 then predicted as TIL tiles or Non-TIL tiles by using the selected TIL detector. The WSI-level TIL  
409 detection (see the example shown in Fig.s5(b)) was then generated by stitching tile-level predic-  
410 tions, where tiles with prediction probabilities above 0.5 were considered as TIL regions. Based on  
411 tumor and TIL detection, we finally computed the ratio between the number of TIL pixels and the  
412 total number of tumor pixels in pathology slides, which was used as a feature variable to quantify  
413 TIL densities within tumor regions.

414 **Code Availability.** Our codes for automatic TMB prediction and patient survival analysis are  
415 available at: [https://github.com/hwanglab/tcga\\_tmb\\_prediction](https://github.com/hwanglab/tcga_tmb_prediction). Our codes for automatic TILs de-  
416 tection are available at: [https://github.com/hwanglab/TILs\\_Analysis](https://github.com/hwanglab/TILs_Analysis).

## 417 5 References

- 418 1. Brown, S. D. et al. Neo-antigens predicted by tumor genome meta-analysis correlate with in-  
420 creased patient survival. *Genome research* 24.5, (2014): 743-750.
- 421 2. Robertson, A. G. et al. Comprehensive molecular characterization of muscle-invasive bladder  
422 cancer. *Cell*, 171.3, (2017): 540-556.
- 423 3. Zhang, Yaxiong, et al. "The correlations of tumor mutational burden among single-region tissue,  
424 multi-region tissues and blood in non-small cell lung cancer." *Journal for immunotherapy of*  
425 *cancer* 7.1 (2019): 1-5.
- 426 4. Hu, Xin, et al. "Multi-region exome sequencing reveals genomic evolution from preneoplasia  
427 to lung adenocarcinoma." *Nature communications* 10.1 (2019): 2978.

- 428 5. Marusyk, Andriy, Michalina Janiszewska, and Kornelia Polyak. "Intratumor heterogeneity: The  
429 rosetta stone of therapy resistance." *Cancer cell* 37.4 (2020): 471-484.
- 430 6. Jamal-Hanjani, Mariam, et al. "Tracking the evolution of nonsmall-cell lung cancer." *New Eng-  
431 land Journal of Medicine* 376.22 (2017): 2109-2121.
- 432 7. Joshi, Kroopa, et al. "Spatial heterogeneity of the T cell receptor repertoire reflects the muta-  
433 tional landscape in lung cancer." *Nature medicine* 25.10 (2019): 1549-1559.
- 434 8. Stanta, Giorgio, and Serena Bonin. "Overview on clinical relevance of intra-tumor heterogene-  
435 ity." *Frontiers in medicine* 5 (2018): 85.
- 436 9. Orhan, Adile, et al. "The prognostic value of tumour-infiltrating lymphocytes in pancreatic  
437 cancer: a systematic review and meta-analysis." *European Journal of Cancer* 132 (2020): 71-  
438 84.
- 439 10. AbdulJabbar, Khalid, et al. "Geospatial immune variability illuminates differential evolution  
440 of lung adenocarcinoma." *Nature Medicine* (2020): 1-9.
- 441 11. Acs, Balazs, et al. "An open source automated tumor infiltrating lymphocyte algorithm for  
442 prognosis in melanoma." *Nature communications* 10.1 (2019): 1-7
- 443 12. Schaumberg, A. J. et al. H&E-stained whole slide image deep learning predicts SPOP mutation  
444 state in prostate cancer. *BioRxiv*, (2018): 064279.
- 445 13. He, K. et al. Deep residual learning for image recognition. In *Proceedings of the IEEE confer-  
446 ence on computer vision and pattern recognition*, (2016): 770-778.

- 447 14. Coudray, N. et al. Classification and mutation prediction from nonsmall cell lung cancer  
448 histopathology images using deep learning. *Nature medicine*, 24.10, (2018): 1559-1567..
- 449 15. Szegedy, C. et al. Rethinking the inception architecture for computer vision. In *Proceedings of*  
450 *the IEEE conference on computer vision and pattern recognition*, (2016): 2818-2826.
- 451 16. Corredor, G. et al. "Spatial architecture and arrangement of tumor-infiltrating lymphocytes for  
452 predicting likelihood of recurrence in early-stage nonsmall cell lung cancer." *Clinical cancer*  
453 *research* 25.5 (2019): 1526-1534.
- 454 17. Ojala, T. et al. Multiresolution gray-scale and rotation invariant texture classification with local  
455 binary patterns. *IEEE Transactions on pattern analysis and machine intelligence*, 24.7, (2002):  
456 971-987.
- 457 18. Chan, Timothy A., et al. "Development of tumor mutation burden as an immunotherapy  
458 biomarker: utility for the oncology clinic." *Annals of Oncology* 30.1 (2019): 44-56.
- 459 19. Frey, B. J., & Dueck, D. Clustering by passing messages between data points. *Science*,  
460 315.5814, (2007): 972-976.
- 461 20. Macenko, M. et al. A method for normalizing histology slides for quantitative analysis. In  
462 *IEEE International Symposium on Biomedical Imaging: From Nano to Macro (ISBI)*, (2009):  
463 1107-1110.
- 464 21. Bandini, Marco, et al. "Predicting the pathologic complete response after neoadjuvant pem-  
465 brolizumab in muscle-invasive bladder cancer." *JNCI: Journal of the National Cancer Institute*  
466 (2020).

- 467 22. Necchi, Andrea, et al. "Updated results of PURE-01 with preliminary activity of neoadjuvant  
468 pembrolizumab in patients with muscle-invasive bladder carcinoma with variant histologies."  
469 *European urology* 77.4 (2020): 439-446.
- 470 23. Idos, Gregory E., et al. "The Prognostic Implications of Tumor Infiltrating Lymphocytes in  
471 Colorectal Cancer: A Systematic Review and Meta-Analysis." *Scientific reports* 10.1 (2020):  
472 1-14.
- 473 24. Plesca, Ioana, et al. "Characteristics of tumor-infiltrating lymphocytes prior to and during  
474 immune checkpoint inhibitor therapy." *Frontiers in Immunology* 11 (2020): 364.
- 475 25. Massi, Daniela, et al. "The density and spatial tissue distribution of CD8+ and CD163+ im-  
476 mune cells predict response and outcome in melanoma patients receiving MAPK inhibitors."  
477 *Journal for immunotherapy of cancer* 7.1 (2019): 1-13.
- 478 26. Oh, David Y., et al. "Intratumoral CD4+ T Cells Mediate Anti-tumor Cytotoxicity in Human  
479 Bladder Cancer." *Cell* (2020).
- 480 27. Chollet, F. Xception: Deep learning with depthwise separable convolutions. arXiv preprint,  
481 (2017): 1610-02357.
- 482 28. Yuan, Yinyin. "Spatial heterogeneity in the tumor microenvironment." *Cold Spring Harbor*  
483 *perspectives in medicine* 6.8 (2016): a026583.
- 484 29. Failmezger, Henrik, et al. "Topological Tumor Graphs: a graph-based spatial model to infer  
485 stromal recruitment for immunosuppression in melanoma histology." *Cancer Research* 80.5  
486 (2020): 1199-1209.



- 487 30. Heindl, Andreas, et al. "Relevance of spatial heterogeneity of immune infiltration for pre-  
488 dicting risk of recurrence after endocrine therapy of ER+ breast cancer." *JNCI: Journal of the*  
489 *National Cancer Institute* 110.2 (2018): 166-175.
- 490 31. Marusyk, Andriy, Michalina Janiszewska, and Kornelia Polyak. "Intratumor heterogeneity:  
491 The rosetta stone of therapy resistance." *Cancer cell* 37.4 (2020): 471-484.
- 492 32. Jimnez-Snchez, Alejandro, et al. "Heterogeneous tumor-immune microenvironments among  
493 differentially growing metastases in an ovarian cancer patient." *Cell* 170.5 (2017): 927-938.
- 494 33. Binnewies, Mikhail, et al. "Understanding the tumor immune microenvironment (TIME) for  
495 effective therapy." *Nature medicine* 24.5 (2018): 541-550.
- 496 34. Courtiol, Pierre, et al. Deep learning-based classification of mesothelioma improves prediction  
497 of patient outcome. *Nature medicine*, 25.10 (2019): 1519-1525..
- 498 35. Corredor, Germn, et al. Spatial architecture and arrangement of tumor-infiltrating lymphocytes  
499 for predicting likelihood of recurrence in early-stage nonsmall cell lung cancer. *Clinical Cancer*  
500 *Research* 25.5 (2019): 1526-1534.
- 501 36. Jackson, Hartland W., et al. "The single-cell pathology landscape of breast cancer." *Nature*  
502 578.7796 (2020): 615-620.
- 503 37. Fu, Yu, et al. "Pan-cancer computational histopathology reveals mutations, tumor composition  
504 and prognosis." *bioRxiv* (2019): 813543.

- 505 38. Kather, Jakob Nikolas, et al. "Pan-cancer image-based detection of clinically actionable ge-  
506 netic alterations." *bioRxiv* (2019): 833756.
- 507 39. Xu, H., et al. Computerized Classification of Prostate Cancer Gleason Scores from Whole  
508 Slide Images. *IEEE/ACM transactions on computational biology and bioinformatics*, (2019).
- 509 40. Fabrizio, Federico Pio, et al. Gene code CD274/PD-L1: from molecular basis toward cancer  
510 immunotherapy. *Therapeutic advances in medical oncology* 10 (2018): 1758835918815598
- 511 41. Kather, Jakob Nikolas, et al. "Deep learning can predict microsatellite instability directly from  
512 histology in gastrointestinal cancer." *Nature medicine* 25.7 (2019): 1054-1056.
- 513 42. Campanella, Gabriele, et al. "Clinical-grade computational pathology using weakly supervised  
514 deep learning on whole slide images." *Nature medicine* 25.8 (2019): 1301-1309.
- 515 43. Jia, Qingzhu, et al. "Local mutational diversity drives intratumoral immune heterogeneity in  
516 non-small cell lung cancer." *Nature communications* 9.1 (2018): 1-10.
- 517 44. Saltz, Joel, et al. "Spatial organization and molecular correlation of tumor-infiltrating lympho-  
518 cytes using deep learning on pathology images." *Cell reports* 23.1 (2018): 181-193.
- 519 45. Song, Bic-Na, et al. "Identification of an immunotherapy-responsive molecular subtype of  
520 bladder cancer." *EBioMedicine* 50 (2019): 238-245.
- 521 46. Azizi, Elham, et al. "Single-cell map of diverse immune phenotypes in the breast tumor mi-  
522 croenvironment." *Cell* 174.5 (2018): 1293-1308.

- 523 47. Chen, Zhaohui, et al. "Single-cell RNA sequencing highlights the role of inflammatory cancer-  
524 associated fibroblasts in bladder urothelial carcinoma." *Nature Communications* 11.1 (2020):  
525 1-12.
- 526 48. Lee, Hye Won, et al. "Single-cell RNA sequencing reveals the tumor microenvironment and  
527 facilitates strategic choices to circumvent treatment failure in a chemorefractory bladder cancer  
528 patient." *Genome medicine* 12 (2020): 1-21.
- 529 49. Chuah, Samuel, and Valerie Chew. "High-dimensional immune-profiling in cancer: implica-  
530 tions for immunotherapy." *Journal for Immunotherapy of Cancer* 8.1 (2020).
- 531 50. Smith, Eric A., and H. Courtney Hodges. "The spatial and genomic hierarchy of tumor ecosys-  
532 tems revealed by single-cell technologies." *Trends in cancer* 5.7 (2019): 411-425.
- 533 51. Moncada, Reuben, et al. "Integrating microarray-based spatial transcriptomics and single-cell  
534 RNA-seq reveals tissue architecture in pancreatic ductal adenocarcinomas." *Nature Biotechnol-  
535 ogy* 38.3 (2020): 333-342.

536 **Acknowledgements** Put acknowledgements here.

537 **Competing Interests** The authors declare that they have no competing financial interests.

538 **Correspondence** Correspondence and requests for materials should be addressed to Dr.Hwang (email:  
539 [hwangt@ccf.org](mailto:hwangt@ccf.org)).

540 **List of Figures**

541 1 An overview of workflow for our proposed approaches to predict TMB status and  
542 TILs from WSIs (a) An Illustration of TMB and TILs pipelines. Given a WSI,  
543 we first divide the WSI into small tiles (i.e., regions) and perform preprocessing  
544 (e.g., color normalization) within the WSI. To predict patient and tile-level TMB  
545 status, we first detect tiles carrying tumors and perform AP clustering to select  
546 representative tiles. We use Xception model to extract features from the selected  
547 representative tiles, then use SVMs to classify patient and/or tile-level TMB sta-  
548 tus. In parallel, we use ResNet18 model to detect TILs regions within the WSI.  
549 We integrate and perform spatial TMB and TILs analysis to identify patient sub-  
550 groups with distinct overall survival outcome. (b) Tumor detection result (over-  
551 lapped greencontours). (c) Example of AP clustering on tumor tiles, where tumor  
552 tiles belonging to different clusters are indicated by different color of blocks in the  
553 image. Several representative tumor tiles indicated by arrows are zoomed-in for  
554 better viewing. (d) 56 representative tumor tiles selected by AP clustering for the  
555 slide shown in (c). . . . . 30

556 2 Evaluations on TMB prediction. Ablation study of our method on TCGA BLCA  
557 TMB prediction: (a) using SVM with Linear kernel, (b) using SVM with RBF  
558 kernel. (c) Baseline comparisons of TCGA BLCA patient-level TMB predictions.  
559 (d) Baseline comparisons of TCGA LUAD patient-level TMB predictions. Note  
560 that in (c)(d) Proposed-LIN and Proposed-RBF represent the proposed technique  
561 using Linear SVM and RBF SVM, respectively. . . . . 31

562 3 Tile-level TMB prediction visualization. (a) Tissue-based TMB-H patient (TCGA-  
563 XF-AAN2) was predicted as patient-level TMB-H based on our WSI-based method.  
564 A heatmap of tile-level TMB prediction across tiles (i.e., tumor regions) and en-  
565 tropy measurement showed that most of tumor regions have TMB-H status (i.g.,  
566 low SH-TMB). (b) Tissue-based TMB low patient (TCGA-XF-A9SH) was pre-  
567 dicted as patient-level TMB low and low SH-TMB based on our WSI-based method.  
568 (c) Tissue-based TMB-H patient (TCGA-DK-A3IT) was predicted as patient-level  
569 TMB-H, while tile-level TMB prediction indicated the high SH-TMB. (d) Tissue-  
570 based TMB low patient (TCGA-FD-A3B7) was predicted as patient-level TMB  
571 low with high SH-TMB. . . . . 32

572 4 WSI-based patient subtypes. (a) A Kaplan-Meier (KM) plot of overall survival  
573 according to WSI-based patient-level TMB-H & low spatial TMB heterogeneity  
574 (High-Low) vs other subtypes. (b) A KM plot of overall survival for 126 WES-  
575 based TMB-H patients according to WSI-based patient-level TMB-H & low spatial  
576 TMB heterogeneity (HHL) vs other WES-based TMB-H subtypes. (c) A KM plot  
577 of overall survival according to WSI-based TILs High & patient-level TMB-H  
578 & low spatial TMB heterogeneity (HHL) vs WSI-based TILs Low & patient-level  
579 TMB-H & low spatial TMB heterogeneity (LHL) vs other subtypes. (d) A KM plot  
580 of overall survival for 126 WES-based TMB-H patients according to WSI-based  
581 TILs high & TMB-H & low spatial TMB heterogeneity (HHHL) vs WSI-based  
582 TILs Low & patient-level TMB-H & low spatial TMB heterogeneity (LHHL) vs  
583 other subtypes. . . . . 33

584 5 Visualization of spatial heterogeneity and organization of TMB-H and TILs within  
585 tumors. Blue color represents identified tissue regions in WSIs. Light blue (e.g.,  
586 Cyan) color represents predicted TMB-H region. Red color represents predicted  
587 TILs. (a)-(c) Patients with high TILs & patient level TMB-H with low spatial  
588 TMB-H heterogeneity (e.g., low TMB entropy) patient slides (HHL subtype). Most  
589 of tumor regions have been predicted as TMB-H status with high level TILs presence.  
590 (d)-(f) Patients with low TILs & patient level TMB-H with low spatial TMB-  
591 H heterogeneity patient slides (LHL subtype). Most of tumor regions have been  
592 predicted as TMB-H status but with low level TILs presence. (g)-(i) Patients with  
593 high TILs & TMB-Low (e.g., others subtype). High TILs present within tumors  
594 with predicted TMB-L status. . . . . 34

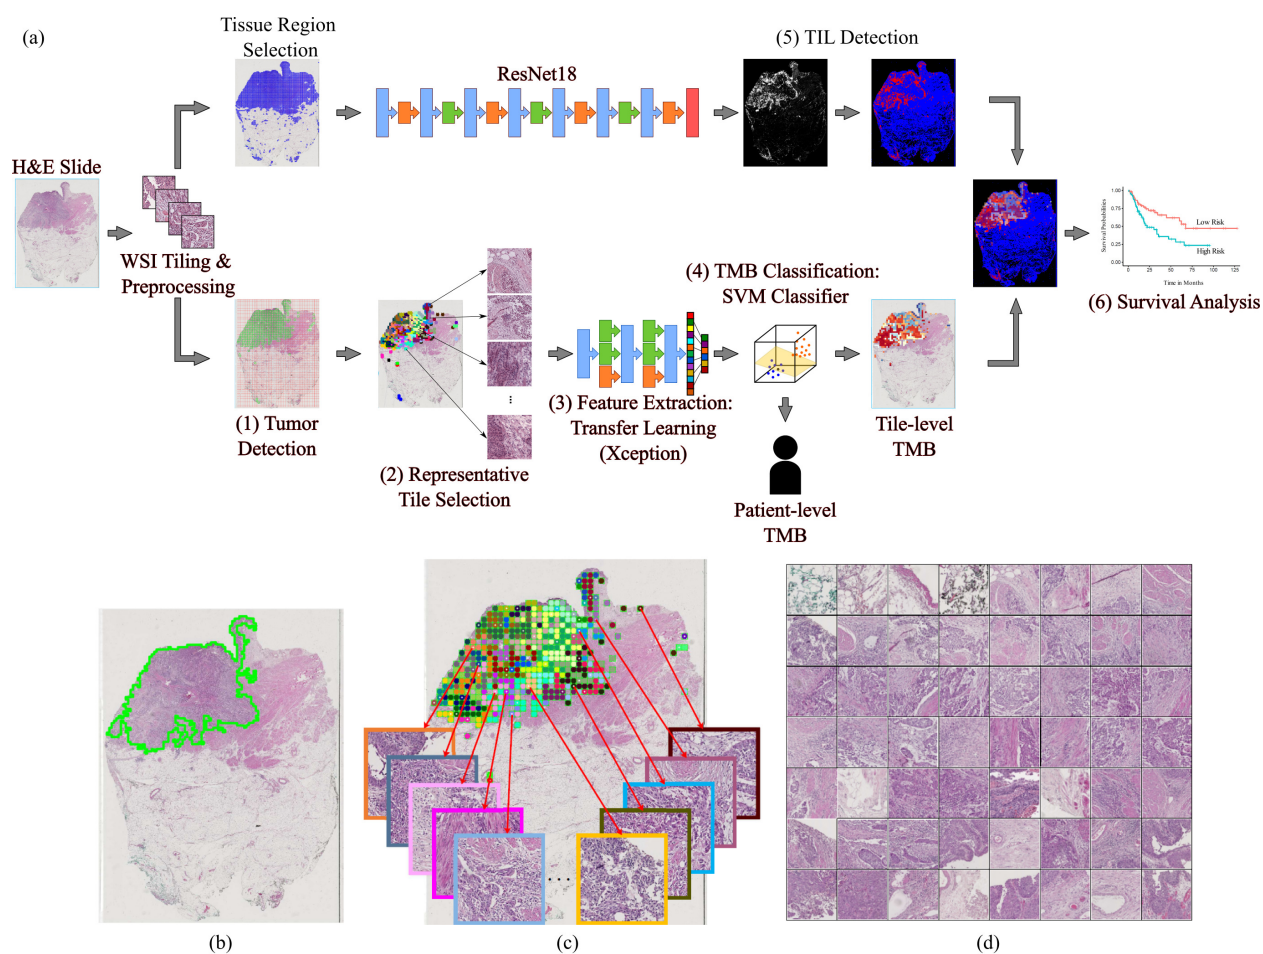

Figure 1: An overview of workflow for our proposed approaches to predict TMB status and TILs from WSIs (a) An Illustration of TMB and TILs pipelines. Given a WSI, we first divide the WSI into small tiles (i.e., regions) and perform preprocessing (e.g., color normalization) within the WSI. To predict patient and tile-level TMB status, we first detect tiles carrying tumors and perform AP clustering to select representative tiles. We use Xception model to extract features from the selected representative tiles, then use SVMs to classify patient and/or tile-level TMB status. In parallel, we use ResNet18 model to detect TILs regions within the WSI. We integrate and perform spatial TMB and TILs analysis to identify patient subgroups with distinct overall survival outcome. (b) Tumor detection result (overlapped green contours). (c) Example of AP clustering on tumor tiles, where tumor tiles belonging to different clusters are indicated by different color of blocks in the image. Several representative tumor tiles indicated by arrows are zoomed-in for better viewing. (d) 56 representative tumor tiles selected by AP clustering for the slide shown in (c).

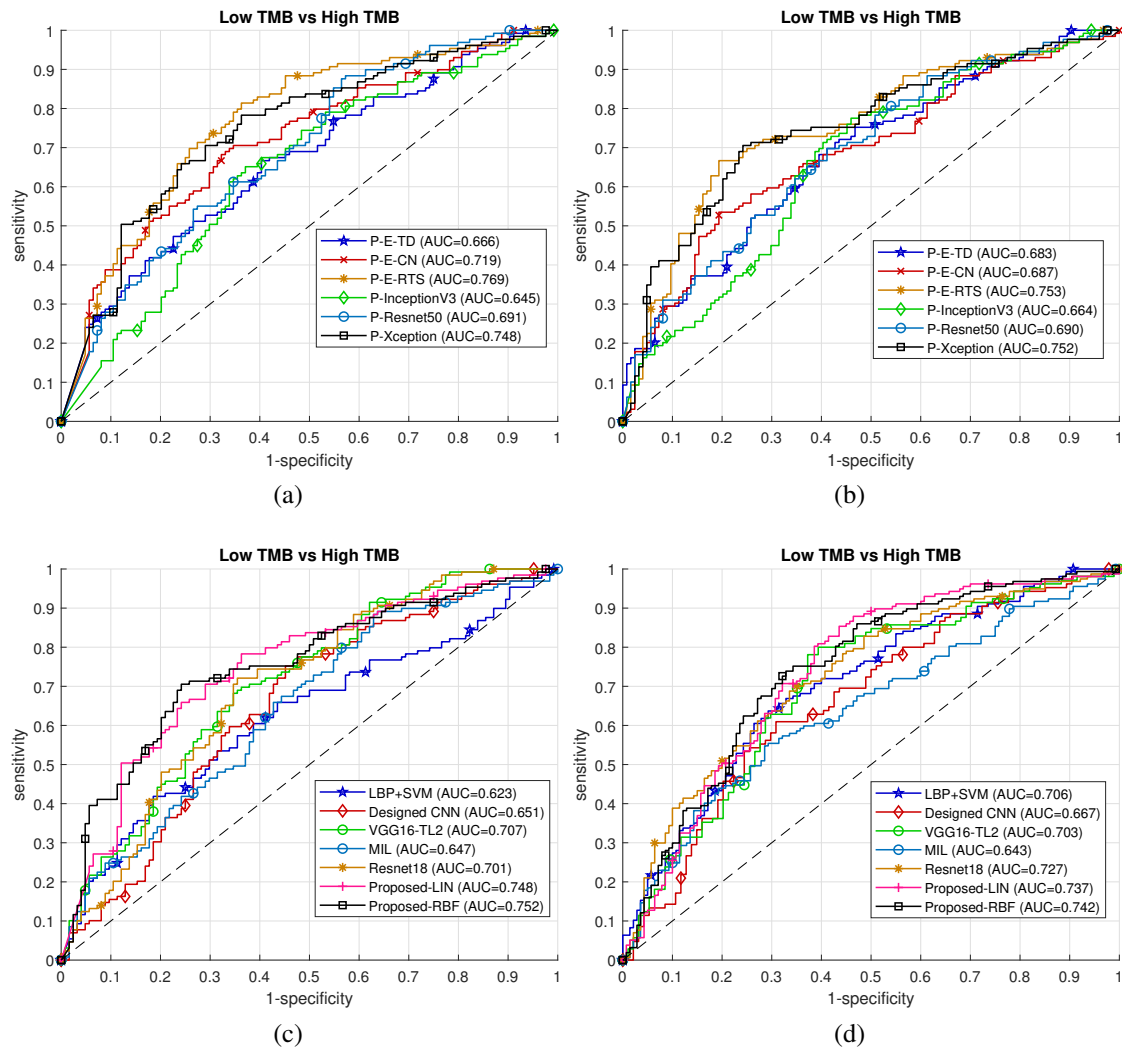

Figure 2: Evaluations on TMB prediction. Ablation study of our method on TCGA BLCA TMB prediction: (a) using SVM with Linear kernel, (b) using SVM with RBF kernel. (c) Baseline comparisons of TCGA BLCA patient-level TMB predictions. (d) Baseline comparisons of TCGA LUAD patient-level TMB predictions. Note that in (c)(d) Proposed-LIN and Proposed-RBF represent the proposed technique using Linear SVM and RBF SVM, respectively.

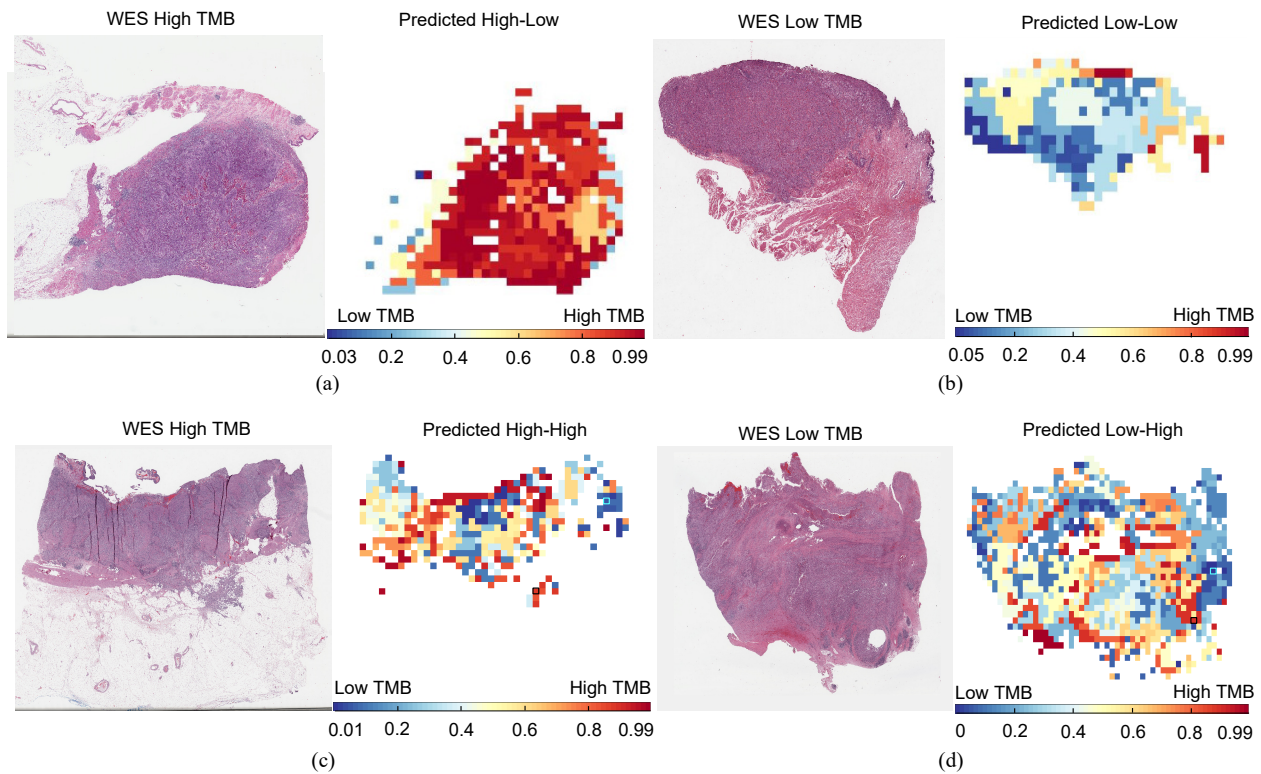



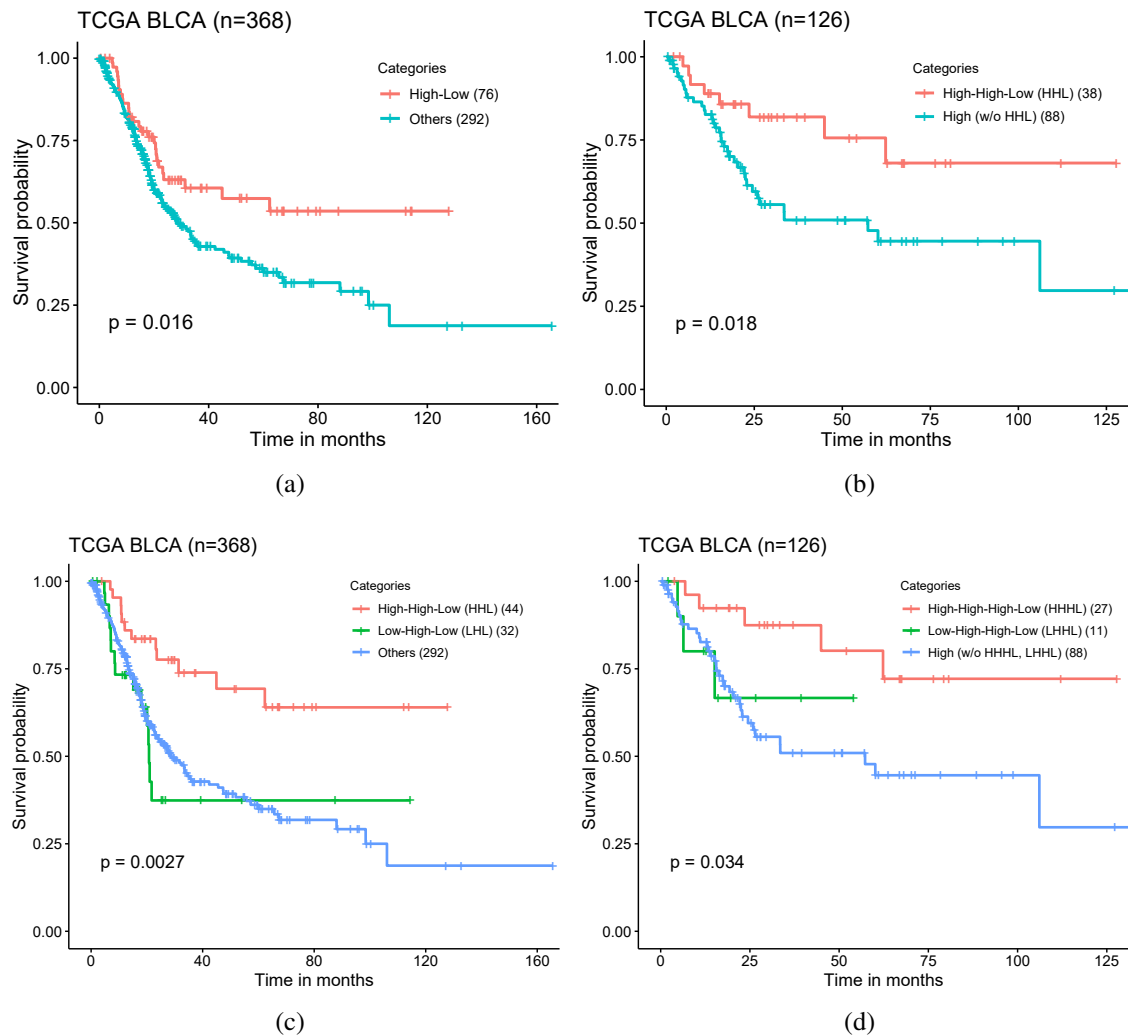

Figure 4: WSI-based patient subtypes. (a) A Kaplan-Meier (KM) plot of overall survival according to WSI-based patient-level TMB-H & low spatial TMB heterogeneity (High-Low) vs other subtypes. (b) A KM plot of overall survival for 126 WES-based TMB-H patients according to WSI-based patient-level TMB-H & low spatial TMB heterogeneity (HHL) vs other WES-based TMB-H subtypes. (c) A KM plot of overall survival according to WSI-based TILs High & patient-level TMB-H & low spatial TMB heterogeneity (HHL) vs WSI-based TILs Low & patient-level TMB-H & low spatial TMB heterogeneity (LHL) vs other subtypes. (d) A KM plot of overall survival for 126 WES-based TMB-H patients according to WSI-based TILs high & TMB-H & low spatial TMB heterogeneity (HHHL) vs WSI-based TILs Low & patient-level TMB-H & low spatial TMB heterogeneity (LHHL) vs other subtypes.

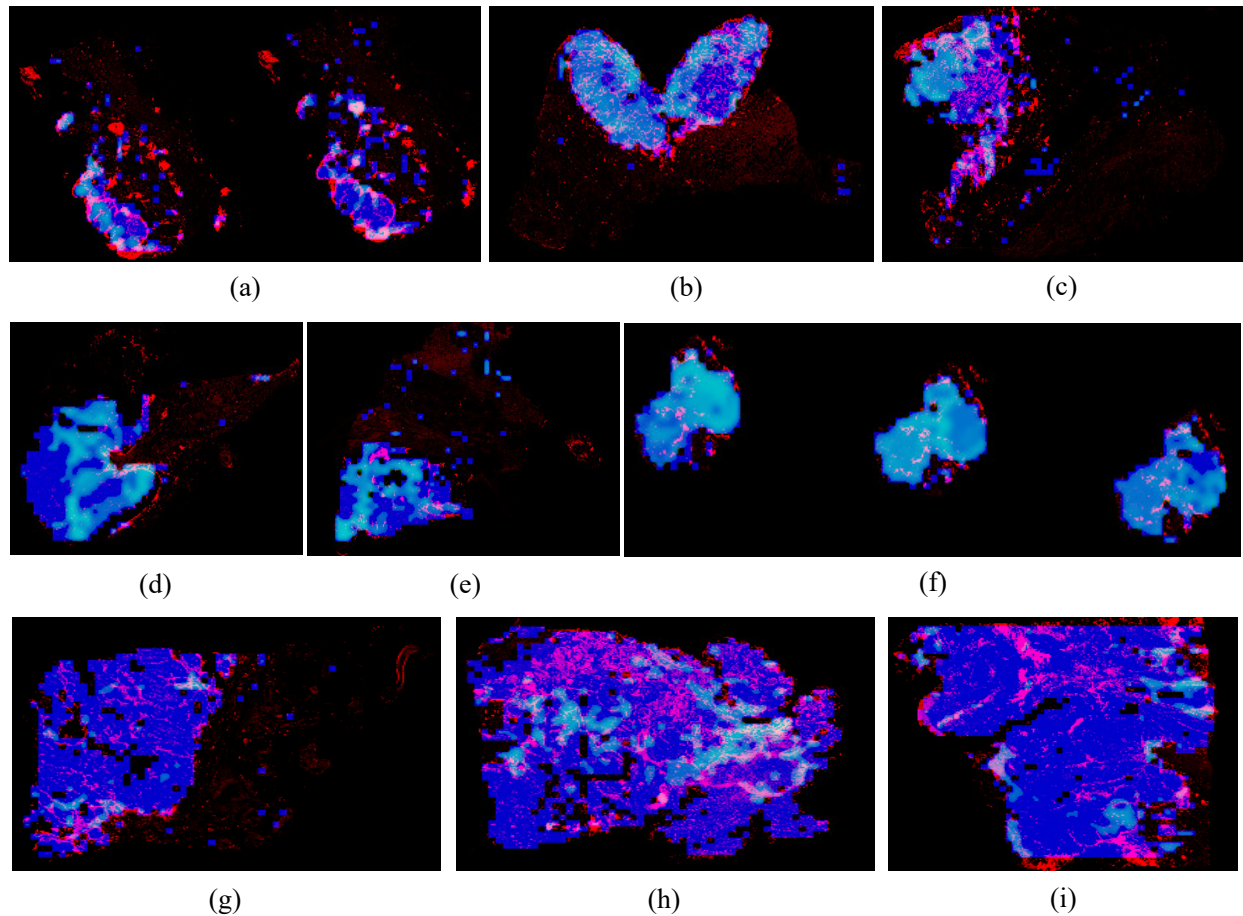

Figure 5: Visualization of spatial heterogeneity and organization of TMB-H and TILs within tumors. Blue color represents identified tissue regions in WSIs. Light blue (e.g., Cyan) color represents predicted TMB-H region. Red color represents predicted TILs. (a)-(c) Patients with high TILs & patient level TMB-H with low spatial TMB-H heterogeneity (e.g., low TMB entropy) patient slides (HHL subtype). Most of tumor regions have been predicted as TMB-H status with high level TILs presence. (d)-(f) Patients with low TILs & patient level TMB-H with low spatial TMB-H heterogeneity patient slides (LHL subtype). Most of tumor regions have been predicted as TMB-H status but with low level TILs presence. (g)-(i) Patients with high TILs & TMB-Low (e.g., others subtype). High TILs present within tumors with predicted TMB-L status.

595 **List of Tables**

596 1 Comparison of patient-level TMB prediction using different methods. In this table,  
597 Proposed-LIN uses SVM classifier with linear kernel, while Proposed-RBF uses  
598 SVM classifier with RBF kernel. . . . . 36

Table 1: Comparison of patient-level TMB prediction using different methods. In this table, Proposed-LIN uses SVM classifier with linear kernel, while Proposed-RBF uses SVM classifier with RBF kernel.

| Cohorts   | Methods        | ACC (%)      | SPE (%)      | SEN (%)      | AUROC (95% CI)             |
|-----------|----------------|--------------|--------------|--------------|----------------------------|
| TCGA-BLCA | LBP+SVM        | 60.47        | 64.52        | 56.59        | 0.623 (0.550-0.689)        |
|           | Designed CNN   | 61.66        | 62.10        | 61.24        | 0.651 (0.581-0.741)        |
|           | VGG16-TL2 [39] | 65.22        | 66.94        | 63.57        | 0.707 (0.639-0.766)        |
|           | MIL [42]       | 58.89        | 58.87        | 58.91        | 0.647 (0.577-0.710)        |
|           | Resnet18 [41]  | 66.80        | 65.32        | 68.22        | 0.701 (0.638-0.765)        |
|           | Proposed-LIN   | 69.57        | 68.55        | <b>70.54</b> | 0.748 (0.683-0.802)        |
|           | Proposed-RBF   | <b>73.12</b> | <b>75.81</b> | <b>70.54</b> | <b>0.752 (0.694-0.810)</b> |
| TCGA-LUAD | LBP+SVM        | 66.67        | <b>70.00</b> | 63.69        | 0.706 (0.645-0.763)        |
|           | Designed CNN   | 63.82        | 67.02        | 60.95        | 0.667 (0.583-0.741)        |
|           | VGG16-TL2 [39] | 69.85        | 62.77        | <b>76.19</b> | 0.703 (0.621-0.766)        |
|           | MIL [42]       | 60.27        | 60.00        | 60.51        | 0.643 (0.578-0.698)        |
|           | Resnet18 [41]  | 67.00        | 65.00        | 68.79        | 0.727 (0.666-0.779)        |
|           | Proposed-LIN   | 69.02        | 62.14        | 75.16        | 0.737 (0.671-0.796)        |
|           | Proposed-RBF   | <b>70.37</b> | 67.86        | 72.61        | <b>0.742 (0.682-0.794)</b> |
